# Supplementary material
Source: Elsevier journal article supplement (https://www.sciencedirect.com/science/article/pii/S2603647920300294)
Supplement: mmc1 [file S2603647920300294:mmc1.docx]

**Anexo 1: Cuestionario de Satisfacción Servicio de Rehabilitación (SAREHA).**

Este cuestionario ha sido diseñado para conocer el grado de satisfacción de las personas que han sido atendidas en el Servicio de Rehabilitación del Hospital Universitario de Salamanca. El presente cuestionario mantendrá en todo momento el anonimato.

|  |  | | | |  | | | |
| --- | --- | --- | --- | --- | --- | --- | --- | --- |
| **(ID) IDENTIFICACIÓN** | | 1**Sexo:** | Hombre | | | | 2**Edad**: ……………… | |
|  | |  | Mujer | | | | 3**Utilizó ambulancia** Sí No | |
| 4**Área de tratamiento:** | | | Gimnasio Traumatología | | | | | Gimnasio Neurología |
|  | | | Gimnasio de Columnas | | | | | Terapia Ocupacional |
|  | | | Hidroterapia | | | | | Electroterapia |
|  | | | Suelo Pélvico | | | | | Rehabilitación Cardiaca |
| 5**Marque los profesionales**que le atendieron o le dieron información: | | | | Médico | | Terapeuta ocupacional | | |
| Fisioterapeuta | | Auxiliar enfermería (TCAE) | | |

Por favor, rellene el formulario, atendiendo a las siguientes indicaciones: Marque las respuestas con “X”

| **(A) ATENCIÓN Y RELACIÓN** | **Muy Malo/a** | **Malo/a** | **Regular** | **Bueno/a** | **Muy Bueno/a** |
| --- | --- | --- | --- | --- | --- |
| 1. La claridad de la información recibida respecto al tratamiento por el: |  |  |  |  |  |
| - 1Médico rehabilitador le pareció |  |  |  |  |  |
| - 2Fisioterapeuta le pareció |  |  |  |  |  |
| - 3Terapeuta Ocupacional le pareció |  |  |  |  |  |
| 2. La claridad de la información recibida respecto a su patología por el: |  |  |  |  |  |
| - 1Médico rehabilitador le pareció |  |  |  |  |  |
| - 2Fisioterapeuta le pareció |  |  |  |  |  |
| - 3Terapeuta Ocupacional le pareció |  |  |  |  |  |
| 3. Los trámites administrativos en el Servicio de Rehabilitación le parecieron |  |  |  |  |  |
| 4. El tiempo de espera, desde que le remitieron al Servicio de Rehabilitación hasta que fue visto por el médico rehabilitador le pareció |  |  |  |  |  |
| 5. El tiempo de espera, desde la visita al médico rehabilitador hasta que inició el tratamiento le pareció |  |  |  |  |  |
| 6. El número de sesiones de Rehabilitación le pareció |  |  |  |  |  |
| 7. Como considera el tiempo dedicado en la consulta médica |  |  |  |  |  |
| 8. Como considera el tiempo dedicado en la sesión de tratamiento |  |  |  |  |  |
| 9. El trato recibido por el: |  |  |  |  |  |
| - 1Médico rehabilitador le pareció |  |  |  |  |  |
| - 2Fisioterapeuta le pareció |  |  |  |  |  |
| - 3Terapeuta ocupacional le pareció |  |  |  |  |  |
| - 4TCAE (Técnico de Cuidados Auxiliares de Enf.) |  |  |  |  |  |
| 10.El interés por resolver su problema por parte del: |  |  |  |  |  |
| - 1Médico rehabilitador le pareció |  |  |  |  |  |
| - 2Fisioterapeuta le pareció |  |  |  |  |  |
| - 3Terapeuta ocupacional le pareció |  |  |  |  |  |
| 11. La identificación de los distintos profesionales del Servicio de Rehabilitación le pareció |  |  |  |  |  |

| **(I) INFRAESTRUCTURA** | **Muy Malo/a** | **Malo/a** | **Regular** | **Bueno/a** | **Muy Bueno/a** |
| --- | --- | --- | --- | --- | --- |
| 12. La duración de los transportes en la ambulancia desde el domicilio al Servicio de Rehabilitación y viceversa le pareció |  |  |  |  |  |
| 13. La limpieza y orden de las instalaciones  (gimnasio, piscina y salas de tratamiento) le pareció |  |  |  |  |  |
| 14. La comodidad de las salas de espera le pareció |  |  |  |  |  |
| 15. La accesibilidad, indicaciones y señalización de los lugares a los que tuvo que ir para recibir el tratamiento le parecieron |  |  |  |  |  |
| 16. El ruido ambiental en la sala de Rehabilitación le pareció |  |  |  |  |  |
| 17. La Iluminación en la sala de Rehabilitación le pareció |  |  |  |  |  |
| 18. El equipamiento (camillas, cuñas, poleas, etc.) y medios tecnológicos (laser, ultrasonidos, TENS, etc.) existentes en el S. de Rehabilitación le parecieron |  |  |  |  |  |

| 19. Tras finalizar el tratamiento rehabilitador se encuentra | | |  |  |
| --- | --- | --- | --- | --- |
| Mucho peor | Peor | Sin cambios | Mejor | Mucho Mejor |

| **(G) GENERAL** |  | **Si** | **No** |
| --- | --- | --- | --- |
| 20. Durante el periodo de tratamiento ¿ha tenido usted un médico de referencia para acudir ante cualquier evento relacionado con su problema de salud? | |  |  |
| 21. Al alta ¿se le fue entregado un informe para el médico que le derivó a nuestro servicio? | |  |  |
| 22. Si tuviera que volver a necesitar rehabilitación y pudiera elegir ¿volvería a nuestro centro? | |  |  |
| 23. Recomendaría usted este Servicio de Rehabilitación a otro paciente. | |  |  |

| 24. Puntuación global sobre la atención recibida en el Servicio de Rehabilitación | 1 | 2 | 3 | 4 | 5 | 6 | 7 | 8 | 9 | 10 |
| --- | --- | --- | --- | --- | --- | --- | --- | --- | --- | --- |
|  |  |  |  |  |  |  |  |  |  |


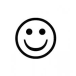

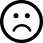


Puede hacer alguna sugerencia para mejorar nuestra atención:

………………………………………………………………………………………………………………………………………………………………………………………………………………………………………………………………………………………………………………

**Gracias por su colaboración.**

**Tabla 1. Característica de los pacientes que cumplimentaron la encuesta del Servicio de Rehabilitación durante los años 2016 - 2017.**

|  | **1ª evaluación 2016**  **(n=121)** | | **2ª evaluación**  **2017**  **(n=86)** | | ***p**** |
| --- | --- | --- | --- | --- | --- |
| **Sexo(n; %)** |  |  |  |  |  |
| Hombre | 47 | 38,8 | 36 | 41,9 | *NS* |
| Mujer | 74 | 61,2 | 50 | 58,1 |  |
| **Edad (media; DS)** |  |  |  |  |  |
| Edad | 58 (±16) | | 57 (±14) | | *NS* |
| **Área de tratamiento (n; %)** |  |  |  |  |  |
| Gimnasio Traumatología | 56 | 45,5 | 38 | 44,2 | *NS* |
| Gimnasio de Columnas | 5 | 4,1 | 2 | 2,3 | *NS* |
| Hidroterapia | 31 | 25,6 | 18 | 20,9 | *NS* |
| Gimnasio Neurología | 9 | 7,4 | 5 | 5,8 | *NS* |
| Terapia Ocupacional | 10 | 8,3 | 8 | 9,3 | *NS* |
| Electroterapia | 48 | 39,7 | 37 | 43,0 | *NS* |
| Rehabilitación Cardiaca | 5 | 4,2 | 1 | 1,1 | *NS* |
| **Precisó transporte sanitario** |  |  |  |  |  |
| Sí | 21 | 17,4 | 14 | 16,3 | *NS* |

**p: p-valor. NS= Resultado de p no significativo.*

**Tabla 2. Relación de las dimensiones con los ítems.**

| **Categorías** | **Ítems** |
| --- | --- |
| Atención y relación | 1. La claridad de la información recibida respecto al tratamiento por el: 2. La claridad de la información recibida respecto a su patología por el: 3. Los trámites administrativos en el Servicio de Rehabilitación le parecieron: 4. El tiempo de espera, desde que le remitieron al Servicio de Rehabilitación hasta que fue visto por el médico rehabilitador le pareció. 5. El tiempo de espera, desde la visita al médico rehabilitador hasta que inició el tratamiento le pareció 6. El número de sesiones de Rehabilitación le pareció 7. Como considera el tiempo dedicado en la consulta médica 8. Como considera el tiempo dedicado en la sesión de tratamiento 9. El trato recibido por el: 10. El interés por resolver su problema por parte del: 11. La identificación de los distintos profesionales del Servicio de Rehabilitación le pareció |
| Infraestructura | 1. La duración de los transportes en la ambulancia desde el domicilio al Servicio de Rehabilitación y viceversa le pareció 2. La limpieza y el orden de las instalaciones (gimnasio, piscina y salas de tratamiento) le pareció 3. La comodidad de las salas de espera le pareció 4. La accesibilidad, las indicacionesy la señalización de los lugares alos que tuvo que ir para recibir eltratamiento le parecieron 5. El ruido ambiental en la sala de Rehabilitación le pareció 6. La iluminación en la sala de Rehabilitación le pareció 7. El equipamiento (camillas, cuñas, poleas, etc.) y medios tecnológicos (láser, ultrasonidos, TENS, etc.) existentes en el Servicio de Rehabilitación le parecieron 8. Tras finalizar el tratamiento rehabilitador se encuentra |
| Satisfacción | 1. Durante el periodo de tratamiento, ¿ha tenido usted un médico de referencia para acudir ante cualquier evento relacionado con su problema de salud? 2. Al alta, ¿se le fue entregado uninforme para el médico que lederivó a nuestro servicio? 3. Si tuviera que volver a necesitar rehabilitación y pudiera elegir. ¿volvería a nuestro centro? 4. ¿Recomendaría usted este Servicio de Rehabilitación a otro paciente? 5. Puntuación global sobre la atención recibida en el Servicio de Rehabilitación |

**Tabla 3. Índice de fiabilidad de las dimensiones de la encuesta.**

| **Encuesta satisfacción** | **Nº sujetos** | **Media** | **DT*** | **Índice de fiabilidad**  **alfa de Cronbach** |
| --- | --- | --- | --- | --- |
| **Atención y relación** |  |  |  |  |
| Preguntas 1 - 11 | 173 | 87,54 | 8,55 | 0,914 |
| **Infraestructura** |  |  |  |  |
| Preguntas 12-19. | 138 | 31,68 | 4,1 | 0,837 |
| **Satisfacción** |  |  |  |  |
| Preguntas 20-23. | 180 | 4,19 | 2,41 | 0,829 |

**DT: desviación típica de puntuación media.*
